# Supplementary material for: Age‐dependent changes in response property and morphology of a thermosensory neuron and thermotaxis behavior in Caenorhabditis elegans
Source: PubMed Central journal article supplement (PMC7253067; doi:10.1111/acel.13146), 2020-04-19
Supplement: ACEL-19-e13146-s001.pdf [file ACEL-19-e13146-s001.pdf]

## **SUPPORTING INFORMATION**

Table S1

Table S2

Supplemental Figures S1-S6

Supplemental Figure Legends

**Table S1.** *C. elegans* strains and transgenes used in this study

| REAGENT or RESOURCE                                                                                      | SOURCE          | IDENTIFIER       |
|----------------------------------------------------------------------------------------------------------|-----------------|------------------|
| Experimental Models: Organisms/Strains                                                                   |                 |                  |
| <i>C. elegans</i> : Strain N2: wild isolate                                                              | CGC             | WormBase: N2     |
| <i>C. elegans</i> : Strain RB2464: <i>tax-2(ok3403)I</i>                                                 | CGC             | WormBase: RB2464 |
| <i>C. elegans</i> : Strain CLP973: <i>daf-16(mu86)I; oyIs18[Pgcy-8::GFP]X</i>                            | This paper      | CLP973           |
| <i>C. elegans</i> : <i>nsIs228[Psrtx-1:GFP]I</i>                                                         | Shai Shaham Lab | N/A              |
| <i>C. elegans</i> : Strain CLP1156: <i>daf-2(e1370)III; oyIs18[Pgcy-8::GFP]X</i>                         | This paper      | CLP1156          |
| <i>C. elegans</i> : Strain VC3113: <i>tax-4(3771)III</i>                                                 | CGC             | WormBase: VC3113 |
| <i>C. elegans</i> : Strain FX949: <i>gcy-8(tm949)IV</i>                                                  | Mitani Lab      | N/A              |
| <i>C. elegans</i> : Strain IK429: <i>gcy-18(nj38)IV</i>                                                  | This paper      | N/A              |
| <i>C. elegans</i> Strain IK597: <i>gcy-23(nj37) gcy-8(oy44) gcy-18(nj38)IV</i>                           | CGC             | WormBase: IK597  |
| <i>C. elegans</i> : Strain PY1322: <i>oyIs18[Pgcy-8::GFP]X</i>                                           | CGC             | WormBase: PY1322 |
| <i>C. elegans</i> : Strain CLP1155: <i>twEx485[Pgcy-8::LifeAct::NeonGreen(NG), gcy-8p::mCherry]</i>      | This paper      | CLP1155          |
| <i>C. elegans</i> : Strain CLP1020: <i>twEx435[Pgcy-8::GCaMP5G::SL2::mCherry]</i>                        | This paper      | CLP1020          |
| <i>C. elegans</i> : Strain IK3626: <i>gcy-8(tm949); njEx1565[gcy-8p::gcy-8, ges-1p::NLS::gfp]</i> line 1 | This paper      | IK3626           |
| <i>C. elegans</i> : Strain IK3627: <i>gcy-8(tm949); njEx1565[gcy-8p::gcy-8, ges-1p::NLS::gfp]</i> line 2 | This paper      | IK3627           |

|                                                                                                             |            |        |
|-------------------------------------------------------------------------------------------------------------|------------|--------|
| <i>C. elegans</i> : Strain IK3628:<br><i>gcy-8(tm949); njEx1565[gcy-8p::gcy-8, ges-1p::NLS::gfp]</i> line 3 | This paper | IK3628 |
| <b>Recombinant DNA</b>                                                                                      |            |        |
| Plasmid: <i>Pgcy-8::GCaMP5G::SL2::mCherry</i>                                                               | This paper | N/A    |
| Plasmid: <i>Pgcy-8::LifeAct::NeonGreen</i>                                                                  | This paper | N/A    |
| Plasmid: <i>Pgcy-8::mCherry</i>                                                                             | This paper | N/A    |
| Plasmid: <i>Pgcy-8::GFP</i>                                                                                 | This paper | N/A    |
| Plasmid: <i>Pgcy-8::gcy-8</i>                                                                               | This paper | N/A    |
| Plasmid: <i>Pgcy-8::gcy-8::GFP</i>                                                                          | This paper | N/A    |
| Plasmid: <i>Pgcy-18::gcy-18::GFP</i>                                                                        | This paper | N/A    |
| Plasmid: <i>Pgcy-23::gcy-23::GFP</i>                                                                        | This paper | N/A    |

**Table S2.** The morphology details of AFD sensory ending during aging

|                                  |          | % defective AFD sensory ending |                          |         |
|----------------------------------|----------|--------------------------------|--------------------------|---------|
| Genotype/Age                     |          | Reduced or swollen mv          | no mv and swollen center | Overall |
| <b>Wild type (<i>oyIs18</i>)</b> |          |                                |                          |         |
| <b>D1</b>                        | <b>N</b> |                                |                          |         |
| Exp. 1                           | 30       | 0                              | 0                        | 0       |
| Exp. 2                           | 31       | 19                             | 0                        | 19      |
| Exp. 3                           | 23       | 9                              | 0                        | 9       |
| Mean                             |          | (9)                            | (0)                      | (9)     |
| <b>D3</b>                        | <b>N</b> |                                |                          |         |
| Exp. 1                           | 25       | 24                             | 0                        | 24      |
| Exp. 2                           | 20       | 10                             | 5                        | 15      |
| Exp. 3                           | 22       | 23                             | 5                        | 27      |
| Mean                             |          | (19)                           | (3)                      | (22)    |
| <b>D6</b>                        | <b>N</b> |                                |                          |         |
| Exp. 1                           | 22       | 55                             | 0                        | 55      |
| Exp. 2                           | 27       | 37                             | 4                        | 41      |
| Exp. 3                           | 24       | 38                             | 0                        | 38      |
| Mean                             |          | (43)                           | (1)                      | (44)    |
| <b>D9</b>                        | <b>N</b> |                                |                          |         |
| Exp. 1                           | 18       | 33                             | 17                       | 50      |
| Exp. 2                           | 17       | 28                             | 17                       | 45      |
| Exp. 3                           | 24       | 54                             | 0                        | 54      |
| Mean                             |          | (38)                           | (11)                     | (50)    |
| <b>D12</b>                       | <b>N</b> |                                |                          |         |
| Exp. 1                           | 24       | 54                             | 17                       | 71      |
| Exp. 2                           | 20       | 45                             | 30                       | 75      |
| Exp. 3                           | 20       | 60                             | 20                       | 80      |
| Mean                             |          | (53)                           | (22)                     | (75)    |
| <b>D16</b>                       | <b>N</b> |                                |                          |         |
| Exp. 1                           | 22       | 82                             | 14                       | 95      |
| Exp. 2                           | 20       | 60                             | 25                       | 85      |

|                            |          |      |      |      |
|----------------------------|----------|------|------|------|
| Exp. 3                     | 17       | 83   | 11   | 94   |
| Mean                       |          | (75) | (17) | (92) |
| <b>Wild type (nsIs228)</b> |          |      |      |      |
| <b>D1</b>                  | <b>N</b> |      |      |      |
| Exp. 1                     | 8        | 0    | 0    | 0    |
| Exp. 2                     | 22       | 14   | 0    | 14   |
| Exp. 3                     | 20       | 15   | 0    | 15   |
| Mean                       |          | (10) | (0)  | (10) |
| <b>D6</b>                  | <b>N</b> |      |      |      |
| Exp. 1                     | 20       | 45   | 5    | 50   |
| Exp. 2                     | 13       | 46   | 0    | 46   |
| Exp. 3                     | 15       | 60   | 0    | 60   |
| Mean                       |          | (50) | (2)  | (52) |
| <b>D12</b>                 | <b>N</b> |      |      |      |
| Exp. 1                     | 17       | 53   | 0    | 53   |
| Exp. 2                     | 17       | 65   | 0    | 65   |
| Exp. 3                     | 13       | 54   | 8    | 62   |
| Mean                       |          | (57) | (3)  | (60) |
| <b>daf-2(e1370)</b>        |          |      |      |      |
| <b>D1</b>                  | <b>N</b> |      |      |      |
| Exp. 1                     | 16       | 19   | 0    | 19   |
| Exp. 2                     | 24       | 8    | 0    | 8    |
| Exp. 3                     | 23       | 9    | 0    | 9    |
| Mean                       |          | (12) | (0)  | (12) |
| <b>D9</b>                  | <b>N</b> |      |      |      |
| Exp. 1                     | 18       | 35   | 12   | 47   |
| Exp. 2                     | 21       | 24   | 10   | 33   |
| Exp. 3                     | 22       | 23   | 0    | 23   |
| Mean                       |          | (27) | (11) | (34) |
| <b>D12</b>                 | <b>N</b> |      |      |      |
| Exp. 1                     | 25       | 52   | 0    | 52   |
| Exp. 2                     | 25       | 50   | 0    | 50   |
| Exp. 3                     | 17       | 59   | 0    | 59   |
| Mean                       |          | (54) | (0)  | (54) |

|                            |          |      |     |      |
|----------------------------|----------|------|-----|------|
| <b>D16</b>                 | <b>N</b> |      |     |      |
| Exp. 1                     | 13       | 23   | 8   | 31   |
| Exp. 2                     | 19       | 42   | 5   | 47   |
| Exp. 3                     | 28       | 32   | 4   | 36   |
| Mean                       |          | (32) | (6) | (38) |
| <b><i>daf-16(mu86)</i></b> |          |      |     |      |
| <b>D1</b>                  | <b>N</b> |      |     |      |
| Exp. 1                     | 24       | 17   | 0   | 17   |
| Exp. 2                     | 18       | 28   | 0   | 28   |
| Exp. 3                     | 24       | 38   | 0   | 38   |
| Mean                       |          | (27) | (0) | (27) |
| <b>D3</b>                  | <b>N</b> |      |     |      |
| Exp. 1                     | 25       | 52   | 8   | 60   |
| Exp. 2                     | 18       | 50   | 8   | 58   |
| Exp. 3                     | 23       | 50   | 8   | 58   |
| Mean                       |          | (51) | (8) | (59) |
| <b>D9</b>                  | <b>N</b> |      |     |      |
| Exp. 1                     | 20       | 70   | 15  | 85   |
| Exp. 2                     | 17       | 65   | 6   | 71   |
| Exp. 3                     | 21       | 67   | 0   | 67   |
| Mean                       |          | (67) | (7) | (74) |
| <b><i>gcy-8(tm949)</i></b> |          |      |     |      |
| <b>D1</b>                  | <b>N</b> |      |     |      |
| Exp. 1                     | 26       | 4    | 0   | 4    |
| Exp. 2                     | 20       | 10   | 0   | 10   |
| Exp. 3                     | 28       | 0    | 0   | 0    |
| Mean                       |          | (5)  | (0) | (5)  |
| <b>D6</b>                  | <b>N</b> |      |     |      |
| Exp. 1                     | 17       | 12   | 6   | 18   |
| Exp. 2                     | 20       | 0    | 0   | 0    |
| Exp. 3                     | 19       | 11   | 0   | 11   |
| Mean                       |          | (8)  | (2) | (10) |
| <b>D12</b>                 | <b>N</b> |      |     |      |
| Exp. 1                     | 22       | 27   | 0   | 27   |

|                                      |          |      |      |      |
|--------------------------------------|----------|------|------|------|
| Exp. 2                               | 15       | 7    | 0    | 7    |
| Exp. 3                               | 12       | 33   | 0    | 33   |
| Mean                                 |          | (22) | (0)  | (22) |
| <b><i>gcy-8(tm949); njEx1565</i></b> |          |      |      |      |
| <b>D1</b>                            | <b>N</b> |      |      |      |
| Exp. 1                               | 29       | 42   | 24   | 66   |
| Exp. 2                               | 24       | 50   | 21   | 71   |
| Exp. 3                               | 23       | 61   | 9    | 70   |
| Exp. 4                               | 16       | 56   | 13   | 69   |
| Mean                                 |          | (52) | (17) | (69) |
| <b>D6</b>                            | <b>N</b> |      |      |      |
| Exp. 1                               | 16       | 44   | 6    | 50   |
| Exp. 2                               | 18       | 61   | 6    | 67   |
| Exp. 3                               | 23       | 74   | 4    | 78   |
| Exp. 4                               | 21       | 72   | 14   | 86   |
| Mean                                 |          | (63) | (8)  | (70) |
| <b>D12</b>                           | <b>N</b> |      |      |      |
| Exp. 1                               | 12       | 58   | 42   | 100  |
| Exp. 2                               | 9        | 44   | 56   | 100  |
| Exp. 3                               | 9        | 33   | 56   | 89   |
| Exp. 4                               | 10       | 60   | 30   | 90   |
| Mean                                 |          | (49) | (46) | (95) |

**A**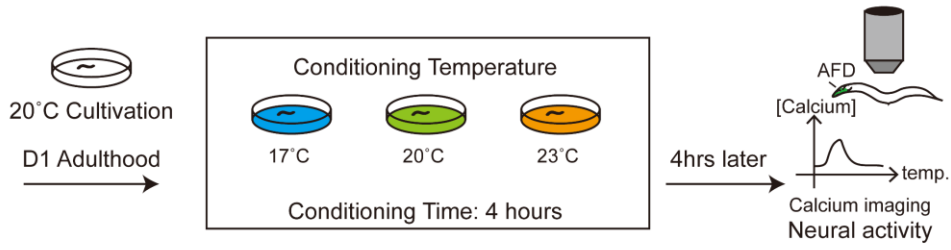**B**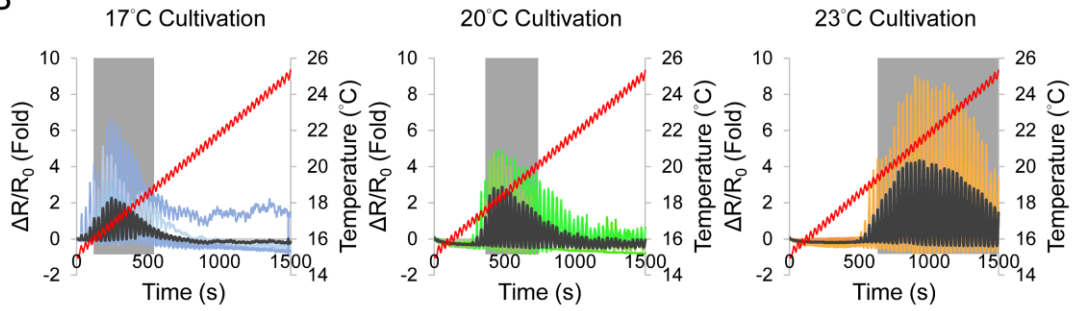**C**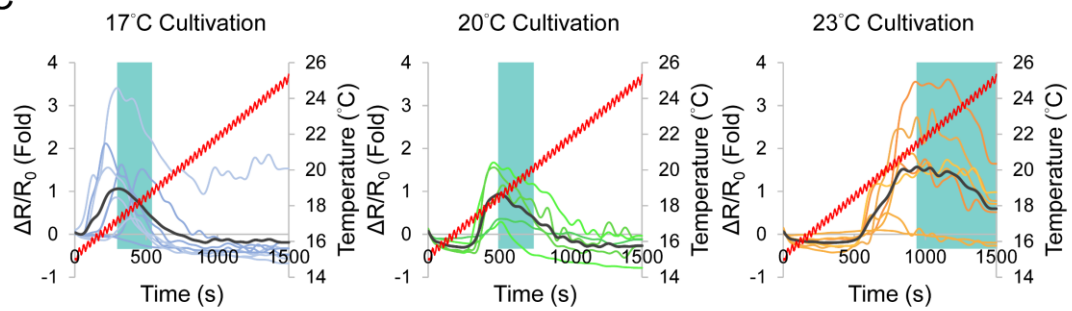**D**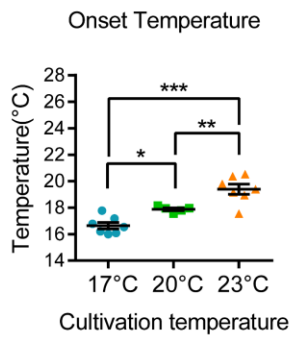**E**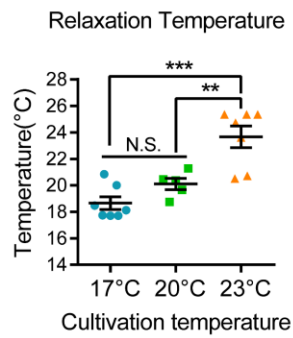**F**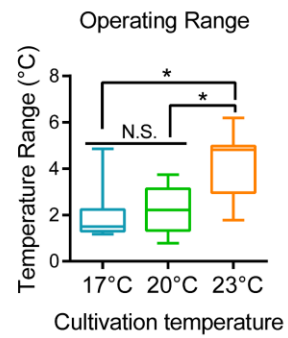



**Figure S1.** Experience-dependent response property of AFD is recapitulated with the oscillating warming paradigm. **(A)** Schematic diagram of the experimental workflow. To avoid the influence of temperature on aging or development, we culture animals at 20°C and shift the cultivation temperature 4 hours before calcium imaging. **(B)** The calcium dynamics of AFD,  $y(t)$ , in animals cultivated at 17°C, 20°C and 23°C, respectively, with distinct onset temperature. Colored traces represent individual recordings and the black traces are group average. Red curves are temperature stimulation. Gray shades mark the average operating range of AFD calcium dynamics recorded from the soma. **(C)** The slow calcium dynamics of AFD,  $y^{sl}(t)$ . Colored traces are  $y^{sl}(t)$  in individual recordings and black traces represent group average. Blue shades mark the average relaxation phase of  $y^{sl}(t)$ . **(D-F)** The onset temperature **(D)**, relaxation temperature **(E)** and operating range **(F)** of AFD calcium dynamics.  $N = 5-7$  animals in each cultivation condition. Error bars = S.E.M. \*,  $p < 0.05$ , \*\*,  $p < 0.01$ , \*\*\*,  $p < 0.001$ , N.S., not significant, one-way ANOVA test followed by *Tukey* HSD multiple comparison test.

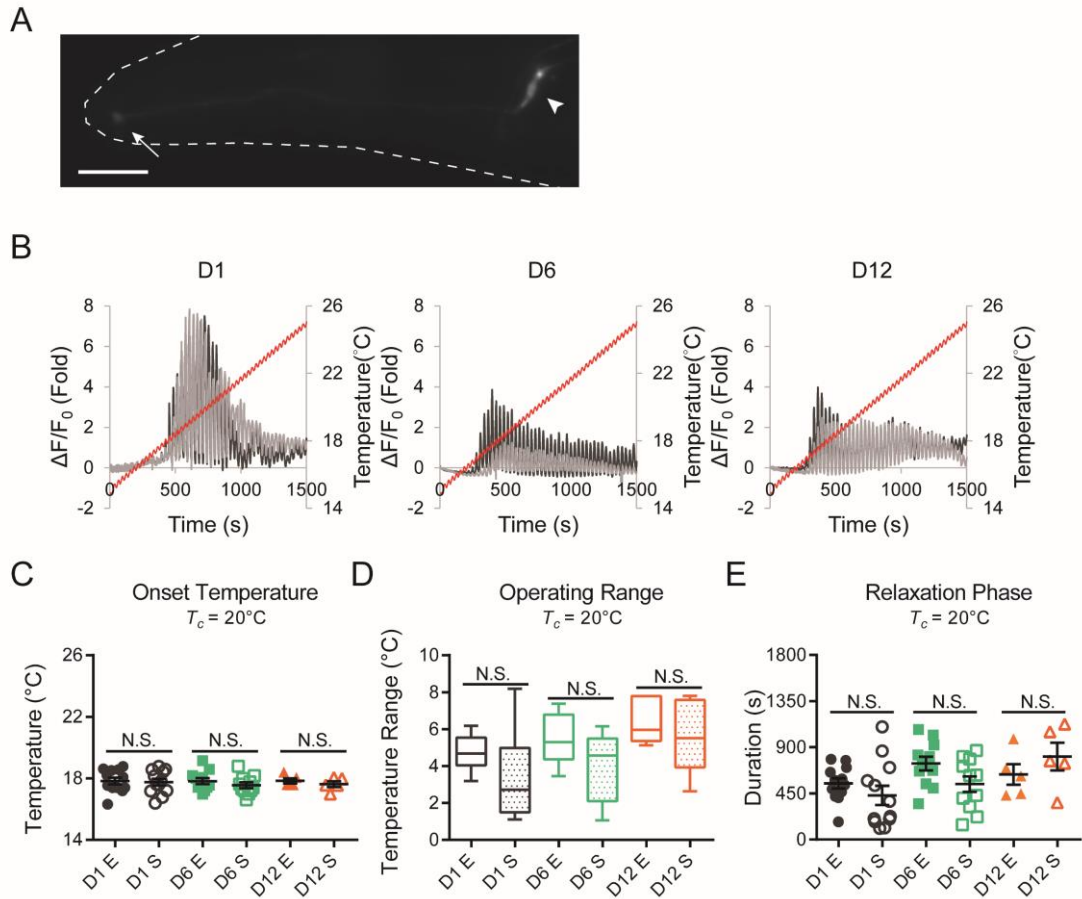

**Figure S2.** Simultaneous recording of calcium dynamics from the sensory ending and soma of AFD in animals cultivated at 20°C. **(A)** A snapshot of simultaneous calcium imaging of the AFD sensory ending and soma in the same frame. The dashed line indicates the profile of the adult worm head. Arrow, the sensory ending; arrowhead, the soma. Scale bar = 10  $\mu\text{m}$ . **(B)** Superimposed temperature-evoked calcium dynamics recorded simultaneously from the sensory ending (light gray) and the soma (dark gray) in individual animals at indicated age. The red line indicates temperature stimulation as described in Figure 3A. **(C-E)** Quantification of temperature at AFD activation onset **(C)**, AFD operating range **(D)** and AFD relaxation phase **(E)** recorded from sensory ending and soma of the same neuron. N = 12, 11 and 5 neurons recorded in D1, D6 and D12 animals, respectively.

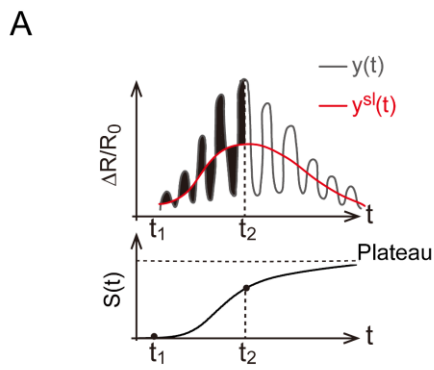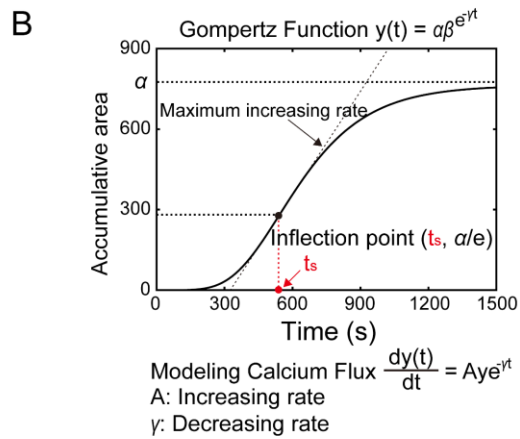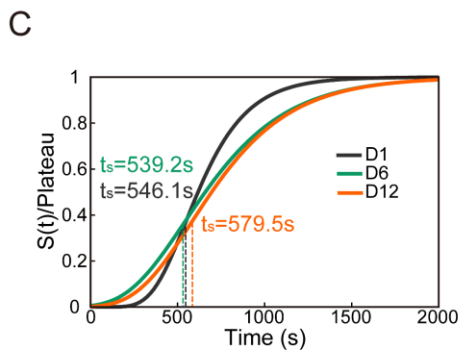

**D**

| Age | Final set of parameters         | Asymptotic Standard Error            |
|-----|---------------------------------|--------------------------------------|
| D1  | $\alpha = 0.972739$             | $\pm 0.0003563$ (0.03663%)           |
|     | $\beta = 6.6791 \times 10^{-8}$ | $\pm 4.669 \times 10^{-9}$ (6.99%)   |
|     | $\gamma = 0.00513623$           | $\pm 7.712 \times 10^{-6}$ (0.1501%) |
| D6  | $\alpha = 1.03628$              | $\pm 0.0005123$ (0.04944%)           |
|     | $\beta = 0.00550421$            | $\pm 6.142 \times 10^{-5}$ (1.116%)  |
|     | $\gamma = 0.00305853$           | $\pm 4.361 \times 10^{-6}$ (0.1426%) |
| D12 | $\alpha = 1.01743$              | $\pm 0.001031$ (0.1013%)             |
|     | $\beta = 0.00197843$            | $\pm 4.931 \times 10^{-5}$ (2.492%)  |
|     | $\gamma = 0.00315543$           | $\pm 8.077 \times 10^{-6}$ (0.256%)  |

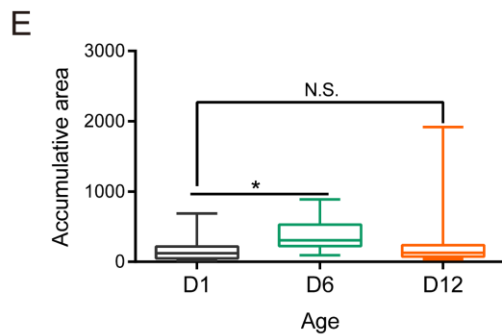

**Figure S3.** Quantitative Analysis and Modeling of AFD calcium flux of animals cultivated at 20°C. **(A)** Schematic diagram of the cumulative AFD calcium flux,  $S(t)$ , in a time series. **(B)** Schematic diagram of the parameters used for fitting of  $S(t)$  by Gompertz function. **(C)** Switching time  $t_s$  for AFD calcium response in Figure 3B.  $N = 27, 23$  and  $12$  neurons recorded in D1, D6 and D12 animals, respectively. **(D)** The parameters of  $S(t)$  for fitting the experimental results of the averaged D1, D6 and D12 AFD accumulative calcium flux. **(E)** Accumulative area between  $y(t)$  and  $y^{sl}(t)$  of AFD responses at the high temperature range (21°C-25°C).  $N = 27, 23$  and  $12$  neurons recorded in D1, D6 and D12 animals used in Figure 3B, respectively. Error bars = S.E.M. N.S., not significant, \*,  $p < 0.05$ , two-way ANOVA test followed by *Tukey* HSD multiple comparison test.

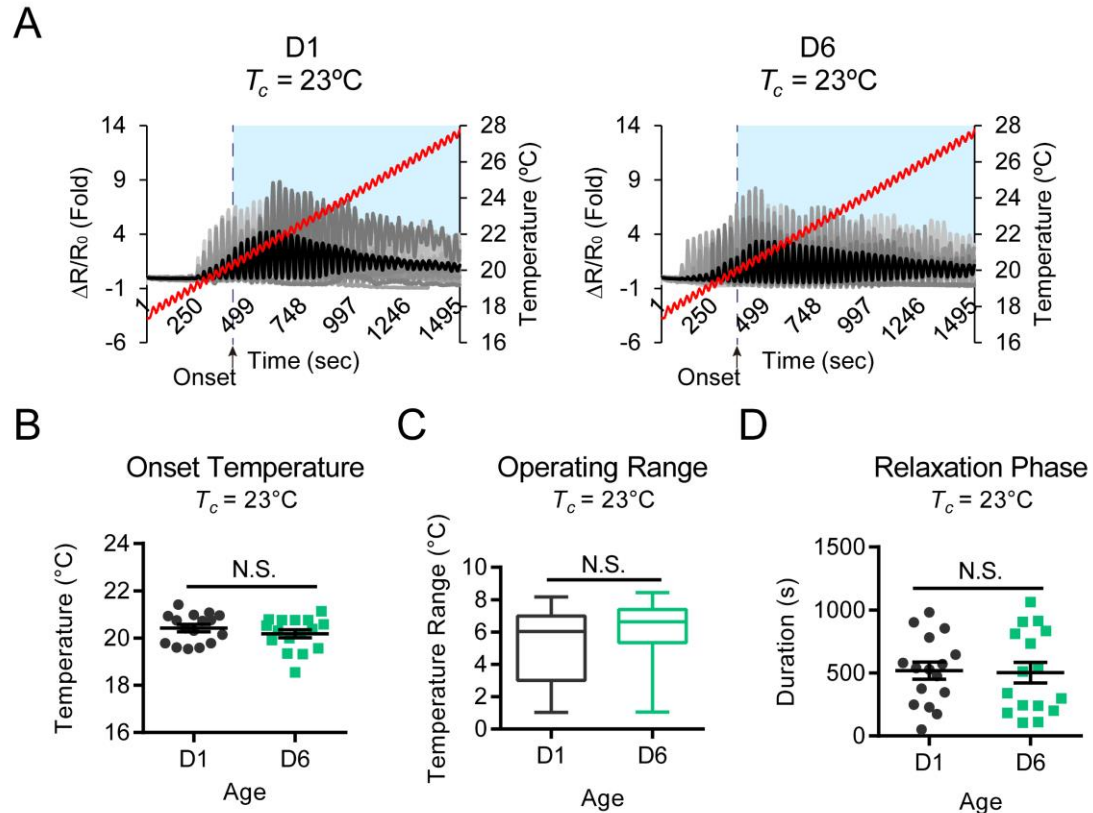

**Figure S4.** AFD Response Property Are Similar in D1 and D6 Animals Cultivated at  $23^\circ\text{C}$ . **(A, B)** The calcium dynamics of AFD in D1 **(A)** and D6 **(B)** animals cultivated at  $23^\circ\text{C}$ , respectively. Colored traces represent individual recordings and the black traces are group average. Red curves are temperature stimulation. Blue shades mark the average operating range of AFD calcium dynamics recorded from the soma. **(C-E)** The onset temperature **(D)**, operating range **(E)** and relaxation phase **(F)** of AFD calcium dynamics.  $N = 16$  neurons recorded in each group. Error bars = S.E.M. N.S., not significant, Unpaired  $t$ -test.

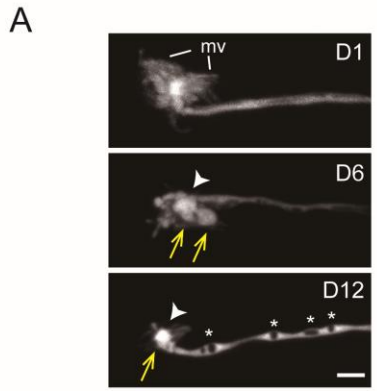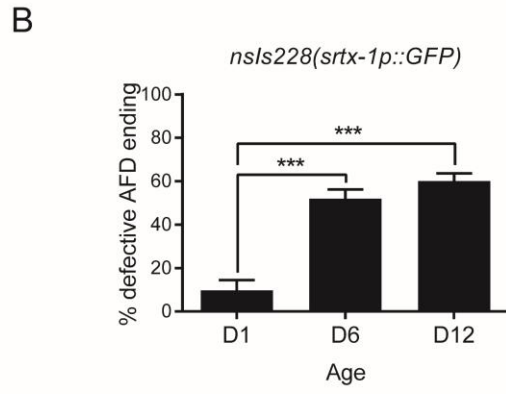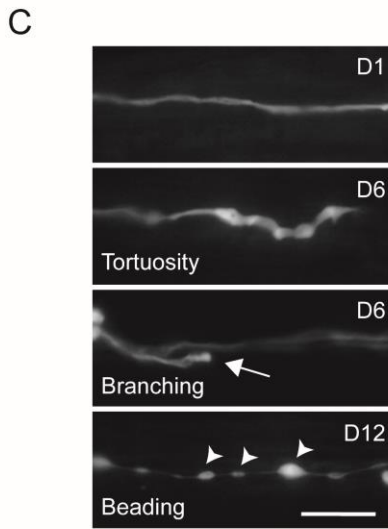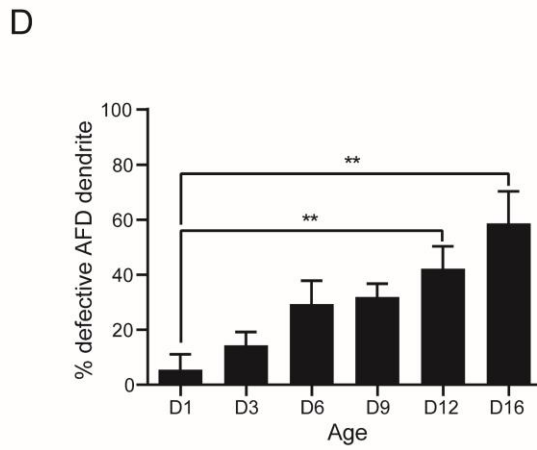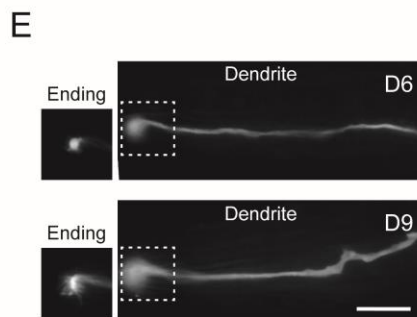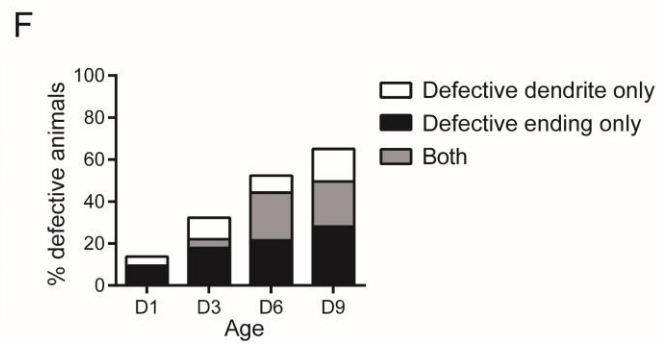

**Figure S5.** Age-dependent changes in AFD sensory endings and dendrites. **(A)** Fluorescent confocal images of the AFD sensory ending during aging. AFD is marked by the transgene *nsIs228(srtx-1p::GFP)*. Arrows indicate microvilli and arrowheads indicate engorged structures in AFD sensory ending. Asterisks indicate bubble-like lesions along the dendrite. Scale bar = 2  $\mu$ m. **(B)** Quantification of age-dependent changes in AFD sensory endings marked by *nsIs228(srtx-1p::GFP)*. N = 3 independent experiments with 8-22 animals for each experiment at each time points. Total numbers of AFD neurons scored: D1 = 50, D6 = 48, D12 = 47. Error bars = S.E.M. \*\*\*,  $p < 0.001$ , one-way ANOVA test followed by *Tukey* HSD multiple comparison test. **(C, D)** Epifluorescent images **(C)** and quantification **(D)** of AFD dendrite defects marked by *oyIs18(gcy-8p::GFP)* at indicated age. Scale bar = 10  $\mu$ m. Error bars = S.E.M. \*\*,  $p < 0.01$ , one-way ANOVA test followed by *Tukey* HSD multiple comparison test. **(E)** Epifluorescent images of dendrite and sensory ending defects from two individual animals at indicated age. The upper panels show a D6 AFD neuron with defective sensory ending and an intact dendrite. The lower panels show a D9 AFD neuron with normal sensory ending but a tortuous dendrite. Scale bar = 10  $\mu$ m. **(F)** Quantification of age-dependent AFD defects grouped by the presence of changes in the dendrite, sensory ending, or both. Animals analyzed are from the three independent cohorts previously scored in Figure 4C. N = 59-84 analyzed neurons in each age cohort.

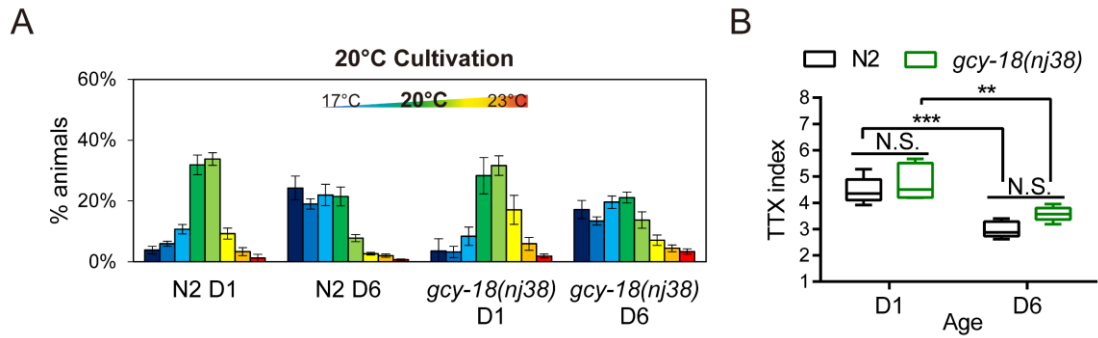

**Figure S6.** Thermotaxis behaviors of young and aged *gcy-18(nj38)* animals cultivated at 20°C. **(A, B)** The distribution **(A)** and TTX index **(B)** of D1 and D6 wild-type and *gcy-18(nj38)* animals on a 17°C-23°C temperature gradient. N = 6-7 assays. Animals are maintained at 20°C prior to the TTX assay. Boxes represent mean ± the first and the third quartile. \*\*,  $p < 0.01$ , \*\*\*,  $p < 0.001$ , N.S., not significant, two-way ANOVA followed by *Tukey* HSD multiple comparison test.
